# Supplementary material
Source: Springer Nature journal article supplement (https://www.springermedizin.de/resource/supplementary/13058_2010_9541_MOESM12_ESM.pdf/9702208)

**A.**

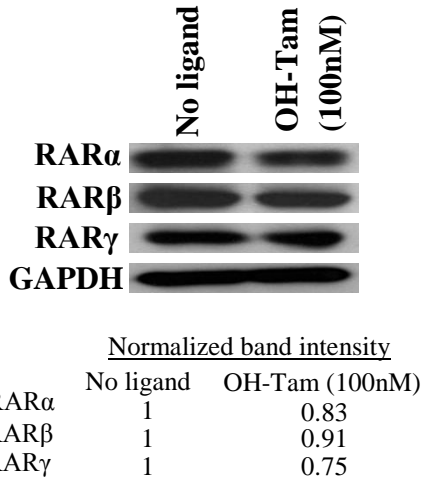

**B.**

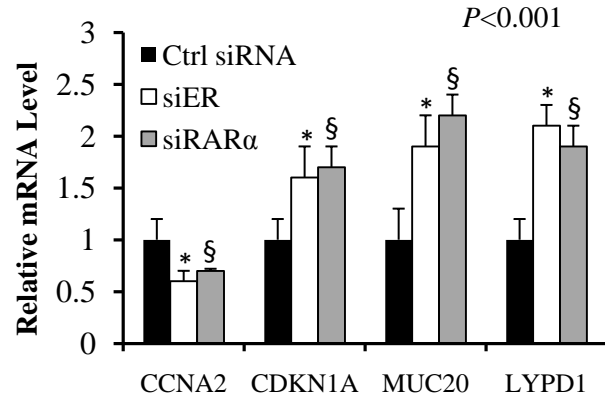

**C.**

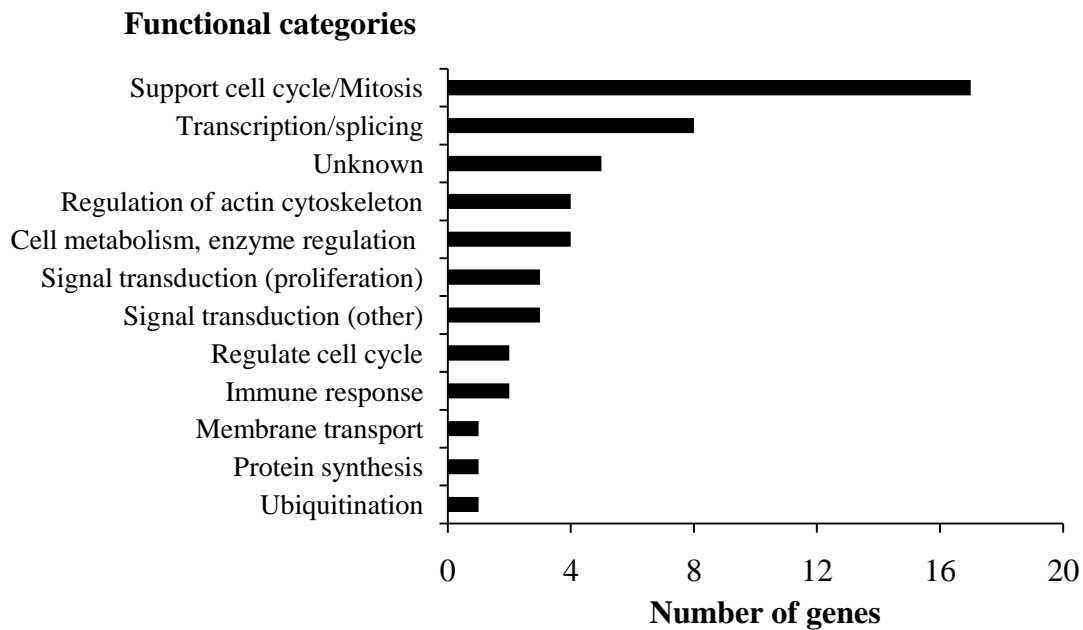

**D.**

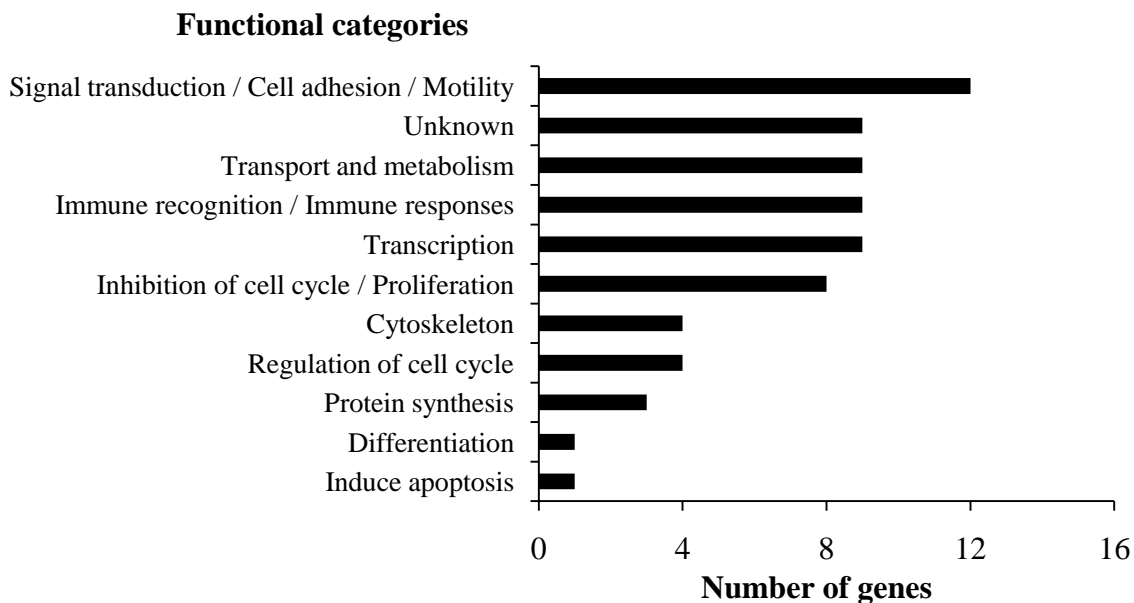

Supplement: MOESM12 [file 9702208]
